# Supplementary material for: Analysis and applications of respiratory surface EMG: report of a round table meeting
Source: Springer Nature journal article supplement (doi:10.1186/s13054-023-04779-x), 2024-01-02

## Comparison of envelopes

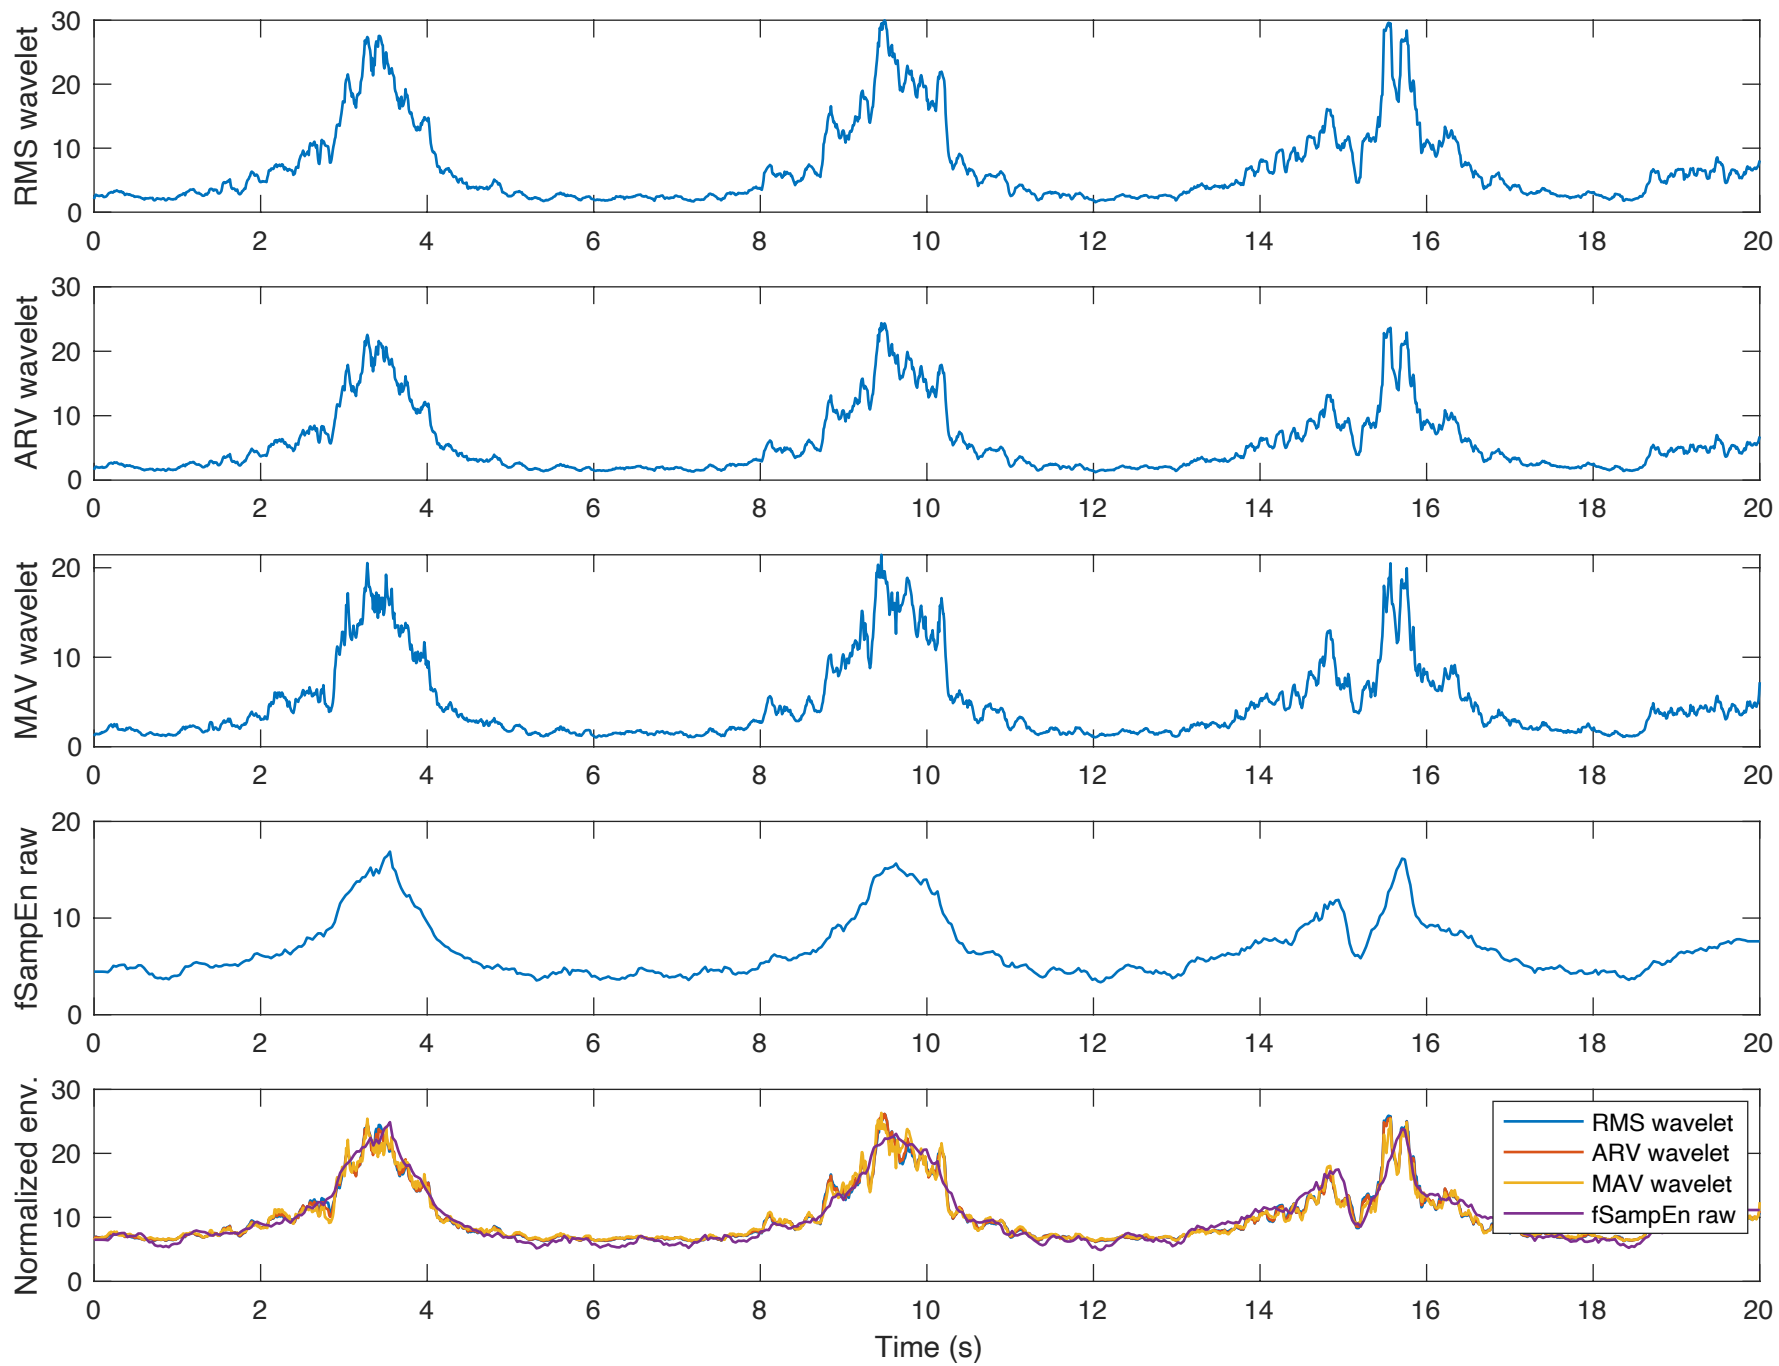

Supplement: MOESM2 [file 26583726]
